# Supplementary material for: eHealth Interventions to Address Sexual Health, Substance Use, and Mental Health Among Men Who Have Sex With Men: Systematic Review and Synthesis of Process Evaluations
Source: J Med Internet Res. 2021 Apr 23;23(4):e22477. doi: 10.2196/22477 (PMC8105760; doi:10.2196/22477)
Supplement: Multimedia Appendix 4 [file jmir_v23i4e22477_app4.docx]

# Appendix 4. Coding structure for process evaluation synthesis

| **Primary codes** | **Secondary codes** | **Tertiary codes** |
| --- | --- | --- |
| HIV testing | Features | Intervention factors affecting variation in intervention receipt: Intervention features |
| nPEP |
| Ordering condoms |
| Ordering HIV test kits |
| PrEP content |
| Reminders |
| Boring | Content | Intervention factors affecting variation in intervention receipt: Barriers |
| Cheesy/strange |
| Content not enjoyable |
| Content suggestions |
| Content too difficult, or confusing |
| Content boring, common sense, repetitive |
| Intrusive |
| Too easy |
| Unclear |
| Media (-) | Format and presentation |
| Not enough media |
| Required additional materials |
| Want less talking and dialogue, more game play |
| Pacing | Length, pacing and time |
| Too busy to complete |
| Too long or slow |
| Age-inappropriate, e.g. ‘babied’ participants | Tailoring and applicability |
| For games, level of challenge inappropriate, e.g. for age |
| Limited value/relevance to own life |
| Not personal or tailored enough |
| Insufficiently gay-specific | Inappropriate orientation to gender or sexual identity/ behaviour |
| For interventions also targeting LGBTQ women, irrelevant content for men |
| Insufficient content for trans people |
| Not optimised for mobile | Technical |
| Technical aspects |
| Technical problems |
| Intrusive, too personal, privacy concerns |
| Language and terms, including gay stigmatising | Other barriers |
| Omitting key issues, e.g. PrEP |
| Approach | Content | Intervention factors affecting variation in intervention receipt: Facilitators |
| Content was clear, understandable and up-to-date |
| Doesn’t use scare tactics |
| Enjoyed content |
| Information, knowledge |
| Information not available elsewhere; about mental health; about broad sexual, emotional, relationship health and sexual function not just STIs |
| Intervention structure |
| Learning skills |
| Liked characters |
| Liked content, found it interesting |
| Not just information |
| Encouraged: adherence to a plan, communication/ closeness with partner | Mechanisms |
| Opportunities for reflection |
| Opportunities for self-expression |
| Reflection: own behaviour/risks |
| Reflection: Inter-relations between substance use, sexual health and/or substance use |
| Can do at home | Format |
| Characters |
| Format, interface |
| Interaction |
| Materials |
| Media pleasant/attractive; variety of media/formats; enjoyable/fun/interesting |
| Daily vs. less frequent self-monitoring; regularity valued for monitoring-based approach | Length, pacing and time |
| For games, liked approach of game relevant to real life |
| Length of modules/sections appropriate |
| Own pace, self-directed |
| Pacing appropriate |
| Characters relatable/like own friends | Tailoring and applicability |
| Realistic and relevant scenarios |
| Tailored to demographic |
| Tailored to individual |
| Easy to use, did not require technical assistance | Technical |
| Few said there were a few technical issues, few technical problems accessing content |
| Trusted that data were secure | Other facilitators |
| Tone and language, not patronising, balance between personal/colloquial and professional language |
| Age | Demographic characteristics | Participant factors affecting variation in intervention receipt |
| Region |
| Race/ethnicity |
| Education level |
| Intervention engagement, completion | Other personal characteristics |
| Level of ART adherence |
| Receiving external therapy |
| Internet speed | Internet speed | Contextual factors affecting variation in intervention receipt |
